# Supplementary material for: PSMs of Hypervirulent Staphylococcus aureus Act as Intracellular Toxins That Kill Infected Osteoblasts
Source: PubMed Central journal article supplement (PMC3653922; doi:10.1371/journal.pone.0063176), 2013-05-14
Supplement: pone.0063176.s001.pdf [file pone.0063176.s001.pdf]

**Table S1. A comparison of distinct lineages of CA-MRSA and HA-MRSA with respect to cytotoxicity toward human osteoblasts, intracellular survival, and alpha-toxin production.**

| Lineage               | LDH release by infected osteoblasts<br>(mean n-fold change to 8325-4 strain [95%CI]) | Viable intracellular bacterial load<br>(mean n-fold change to 8325-4 strain [95%CI]) | Alpha-toxin production<br>(median ng/ml [IQR]) |
|-----------------------|--------------------------------------------------------------------------------------|--------------------------------------------------------------------------------------|------------------------------------------------|
| ST8-USA300-IV (n=5)   | 1.73 [1.40-2.07]                                                                     | 0.76 [0.38-1.14]                                                                     | 7650 [1110-9337]                               |
| ST80-IV (n=5)         | 1.71 [1.63-1.80]                                                                     | 0.99 [0.67-1.31]                                                                     | 1929 [1649-2434]                               |
| ST30-USA1100-IV (n=5) | 1.56 [1.12-2.00]                                                                     | 0.42 [0.28-0.56]                                                                     | 5556 [5503-7715]                               |
| CA-MRSA (total, n=15) | 1.67 [1.53-1.81]                                                                     | 0.72 [0.54-0.91]                                                                     | 5153 [1790-7683]                               |
| ST239-III (n=5)       | 1.06 [0.91-1.21]                                                                     | 2.70 [1.36-4.05]                                                                     | 2327 [143-3424]                                |
| ST228-I (n=5)         | 0.95 [0.87-1.03]                                                                     | 2.28 [1.58-2.98]                                                                     | 4 [3-8]                                        |
| ST8-EMRSA2-IV (n=5)   | 0.92 [0.78-1.06]                                                                     | 2.84 [2.07-3.61]                                                                     | 2293 [305-3529]                                |
| ST22-EMRSA15-IV (n=5) | 1.02 [0.85-1.18]                                                                     | 2.16 [1.48-2.85]                                                                     | 5729 [4193-5839]                               |
| HA-MRSA (total, n=20) | 0.99 [0.93-1.04]                                                                     | 2.50 [2.15-2.84]                                                                     | 2310 [36-4326]                                 |
